1 **Title**

2 Single-cell analysis of bronchoalveolar cells in inflammatory and fibrotic post-COVID  
3 lung disease

4 **Authors**

5 Puja Mehta<sup>2\*</sup>, Blanca Sanz-Magallón Duque de Estrada<sup>1\*†</sup>, Emma K Denny<sup>2\*</sup>,  
6 Kane Foster<sup>3</sup>, Carolin T Turner<sup>1</sup>, Andreas Mayer<sup>1</sup>, Martina Milighetti<sup>1</sup>, Manuela Platé<sup>2</sup>,  
7 Kaylee B Worlock<sup>2</sup>, Masahiro Yoshida<sup>2</sup>, Jeremy S Brown<sup>2</sup>, Marko Z Nikolić<sup>2</sup>, Benjamin  
8 M Chain<sup>1</sup>, Mahdad Noursadeghi<sup>1</sup>, Rachel C Chambers<sup>2\*</sup>, Joanna C Porter<sup>2\*</sup>, Gillian S  
9 Tomlinson<sup>1\*†</sup>

10 \*These authors contributed equally.

11 †Corresponding authors.

12 **Affiliations**

- 13 1. Division of Infection and Immunity, University College London, London, UK  
14 2. UCL Respiratory, University College London, London, UK  
15 3. UCL Cancer Institute, University College London, London, UK

16 **Corresponding authors**

17 Dr Gillian S Tomlinson and Dr Blanca Sanz-Magallón Duque de Estrada, Infection and  
18 Immunity, University College London, Cruciform Building, Gower Street, London  
19 WC1E 6BT, United Kingdom. Email: [g.tomlinson@ucl.ac.uk](mailto:g.tomlinson@ucl.ac.uk),  
20 [blanca.estrada.16@ucl.ac.uk](mailto:blanca.estrada.16@ucl.ac.uk)

21

22 **ABSTRACT**

23 **Background** Persistent radiological lung abnormalities are evident in many survivors  
24 of acute coronavirus disease 2019 (COVID-19). Consolidation and ground glass  
25 opacities are interpreted to indicate subacute inflammation whereas reticulation is  
26 thought to reflect fibrosis. We sought to identify differences at molecular and cellular  
27 level, in the local immunopathology of post-COVID inflammation and fibrosis.

28 **Methods** We compared single-cell transcriptomic profiles and T cell receptor (TCR)  
29 repertoires of bronchoalveolar cells obtained from convalescent individuals with each  
30 radiological pattern, targeting lung segments affected by the predominant abnormality.

31 **Results** Single-cell transcriptomes of inflammatory and fibrotic post-COVID lung  
32 disease closely resembled each other across all cell types. However, CD4 central  
33 memory T cells and CD8 effector memory T cells were significantly more abundant in  
34 those with inflammatory radiology. Clustering of similar TCRs from multiple donors  
35 was a striking feature of both phenotypes, consistent with tissue localised antigen-  
36 specific immune responses. There was no enrichment for known SARS-CoV-2-  
37 reactive TCRs, raising the possibility of T cell-mediated immunopathology driven by  
38 failure in immune self-tolerance.

39 **Conclusions** We found no evidence that post-COVID radiographic inflammation and  
40 fibrosis are associated with differential immunopathological pathways. Both show  
41 evidence of shared antigen-specific T cell responses, suggesting a role for therapies  
42 targeting T cells in limiting post-COVID lung damage.

43

## 44 INTRODUCTION

45 Persistent functional and radiological lung abnormalities are evident at one year in  
46 approximately 20% of people who survive acute coronavirus disease 2019 (COVID-  
47 19) (Fabbri et al., 2023). Current understanding of the immunopathogenic  
48 mechanisms responsible for post-COVID lung disease (PCLD) is very limited (Mehta  
49 et al., 2022). Elevated numbers of airway CD4 and CD8 T cells have been reported  
50 (Cheon et al., 2021; Vijayakumar et al., 2022) and the post-COVID airway proteome  
51 displays evidence of ongoing epithelial injury that resolves with time (Vijayakumar et  
52 al., 2022). It is imperative to address this knowledge deficit to inform therapeutic  
53 interventions that could expedite resolution of pathology and minimize irreversible  
54 tissue damage, to reduce long term morbidity secondary to PCLD and the attendant  
55 burden on healthcare services.

56 There has been the impression of two major radiological patterns in PCLD:  
57 consolidation and ground glass opacities, thought to represent subacute inflammation,  
58 and reticulation, widely interpreted as fibrosis (Fabbri et al., 2023; Stewart et al., 2022).  
59 Inflammation predominates during acute COVID-19, but fibrosis is evident on 32% of  
60 computed tomography (CT) scans during hospitalisation. Follow-up imaging within the  
61 first year suggests radiological sequelae reduce with time, with less marked  
62 improvement in fibrosis (Fabbri et al., 2023). We hypothesised that these distinct  
63 radiological changes reflect distinct pathogenic mechanisms, which may require  
64 different treatments. We sought to evaluate the molecular characteristics of cellular  
65 function at the site of disease in PCLD, by single-cell RNA sequencing (scRNAseq) of  
66 bronchoalveolar cells from convalescent individuals infected during the first or second  
67 waves of the pandemic, with predominant CT features of inflammation or fibrosis at

68 the time of sampling.

69 We showed that in comparison to fibrotic PCLD, the bronchoalveolar environment of  
70 inflammatory PCLD was enriched for CD4 T central memory cells (TCM) and CD8 T  
71 effector memory cells (TEM). Consistent with this finding, a higher proportion of CD4  
72 TCM clones were expanded in the inflammatory phenotype. Both inflammatory and  
73 fibrotic PCLD bronchoalveolar T cells exhibited high levels of T cell receptor (TCR)  
74 clustering, indicative of an antigen-specific immune response, but there was no  
75 enrichment for known severe acute respiratory syndrome coronavirus 2 (SARS-CoV-  
76 2)-reactive sequences. No major differences were evident in any of the cell type-  
77 specific transcriptomic profiles of the two radiological phenotypes, suggesting that they  
78 may represent different manifestations of the same disease process.

## 79 **RESULTS**

### 80 **Increased abundance of bronchoalveolar T cells in inflammatory PCLD**

81 Individuals undergoing bronchoscopy for clinical investigation of persistent respiratory  
82 symptoms and predominant radiological features of either inflammation or fibrosis  
83 following acute COVID-19, with no previous evidence of interstitial lung disease (ILD)  
84 were recruited (Figure 1a). Bronchoalveolar lavage (BAL) samples from lung  
85 segments affected by the predominant abnormality were obtained from five subjects  
86 with each radiological pattern (Figure 1a). Clinical and demographic characteristics  
87 are provided in Table 1 and Supplementary Table 1. Evaluation of the composition of  
88 post-COVID BAL by scRNAseq revealed that macrophages dominated in all subjects,  
89 with smaller T cell, NK T cell, dendritic cell, epithelial and B cell populations also  
90 identified (Figure 1b-d and Supplementary Figure 1a-d). Each of the cell types  
91 expressed high levels of independently established marker genes (Adams et al., 2020;

92 Cheng et al., 2021; David et al., 2021; Davies et al., 2013; Davis and Wypych, 2021;  
93 Gardell and Parker, 2017; Glass et al., 2020; Murray and Wynn, 2011; Tsyklauri et al.,  
94 2023; van Aalderen et al., 2021; Villani et al., 2017), validating our annotations (Figure  
95 1d). The notable difference between the two phenotypes was significantly higher  
96 abundance of CD4 T cells and CD8 T cells in inflammatory PCLD (Figure 1e). The  
97 relative proportions of the other seven cell types present were not found to differ  
98 between the two radiological phenotypes, providing confidence our analysis was not  
99 confounded by compositional bias, where alterations in the proportion of one cell type  
100 lead to many other cell types being falsely identified as differentially abundant.

101 To explore differences in cell type-specific transcriptional profiles between the two  
102 radiological phenotypes, we first aggregated gene expression count data for each cell  
103 type for each donor to form “pseudobulks”. We leveraged the ability of pseudobulk  
104 statistical approaches to account for variability of biological replicates, allowing  
105 detection of genuine differential gene expression whilst minimizing false discoveries  
106 (Squair et al., 2021). Very few cell type-specific differentially expressed genes were  
107 identified (Supplementary Table 2), which precluded further bioinformatic analysis and  
108 suggested the transcriptomes of inflammatory and fibrotic PCLD were similar for all  
109 cell types.

110 Detection of transcriptomic differences between the two groups using pseudobulk  
111 statistical analysis may have been limited by small sample size. Therefore, we  
112 repeated the comparison of inflammatory and fibrotic PCLD at the level of individual  
113 cells. Single-cell statistical analysis identified thousands of cell type-specific  
114 differentially expressed genes in each radiological phenotype. However, single-cell  
115 differential gene expression analysis has a propensity for false positive results (Squair

116 et al., 2021). To mitigate against this, we sought to assess whether differentially  
117 expressed gene lists represented differentially enriched biological pathways in the two  
118 study groups. This was not evident at the level of biological processes or upstream  
119 regulator analysis (Supplementary Figure 2 and 3), which suggested enrichment of  
120 overlapping processes and pathways despite apparent differential gene expression.  
121 Hence, our single-cell analysis also supports the outcome of the pseudobulk analysis.

## 122 **CD4 central memory and CD8 effector memory are the predominant T cell** 123 **subsets in PCLD**

124 Given that greater abundance of T cells in inflammatory cases was the only robust  
125 difference between the two PCLD radiological phenotypes, we re-clustered these  
126 populations alone to undertake a more detailed analysis. This revealed CD4 TCM and  
127 CD8 TEM as the two predominant T cell subsets in the PCLD bronchoalveolar  
128 environment, and a smaller population of regulatory T cells (Treg). A small mixed T  
129 cell cluster, which expressed high levels of interferon-stimulated genes and an NK cell  
130 cluster were also present in all samples. A minor population of gamma delta T cells  
131 was identified in one individual with inflammatory PCLD (Figure 2a-c). There was no  
132 difference in the relative proportions of any T cell subset between the two PCLD  
133 phenotypes (Figure 2d).

134 Analysis of T cell subset pseudobulks revealed no genes as differentially expressed  
135 in either group (Supplementary Table 2), consistent with our earlier observation of few  
136 differences between the transcriptional programmes of the two PCLD phenotypes at  
137 the level of broad cell types defined using the full dataset. In single-cell differential  
138 expression analysis of T cells, genes expressed at a significantly higher level in CD4  
139 TCM and CD8 TEM in inflammatory PCLD exhibited weak enrichment for immune

140 response signalling pathways (Supplementary Figure 4a). Robust enrichment of  
141 cellular pathways in anti-viral responses was evident for genes expressed at a  
142 significantly higher level in CD4 TCM and CD8 TEM in fibrotic PCLD (Supplementary  
143 Figure 4b), but this was not supported by enrichment for Type I interferon signalling in  
144 upstream regulator analysis (Supplementary Figure 5b). Interestingly, interleukin (IL)2  
145 and IL15 were the most statistically significant upstream regulators of CD4 TCM and  
146 CD8 TEM differentially expressed genes in inflammatory PCLD but not fibrotic PCLD,  
147 consistent with the notion of cytokine driven proliferation leading to increased  
148 abundance of T cells in the former phenotype (Supplementary Figure 5a-c).

#### 149 **Alveolar macrophage and monocyte subsets in PCLD are consistent with** 150 **healthy airspace myeloid populations**

151 Macrophages are the most abundant cell types in healthy airspaces (Mould et al.,  
152 2021) and were also found to be the most abundant cell type in PCLD BAL samples  
153 in the present study. Macrophage subpopulations have been implicated in the  
154 pathogenesis of fibrosis associated with severe COVID-19 and idiopathic pulmonary  
155 fibrosis (Nouno et al., 2019; Wendisch et al., 2021). We therefore re-clustered  
156 macrophages alone to further our understanding of macrophage subpopulations in  
157 PCLD. Two populations with similar expression of macrophage markers and  
158 comparable transcriptomic profiles, likely representative of the transcriptional  
159 spectrum of resident healthy alveolar macrophages (AM) (Mould et al., 2021) were  
160 combined for subsequent analysis (Figure 3a,b and Supplementary Figure 6a,b). We  
161 identified three further small specialized AM subsets previously detected in healthy  
162 individuals (Mould et al., 2021), characterized by high levels of proinflammatory  
163 molecule expression, “Inflam AM”, metal-binding metallothioneins, “MT-AM”, or

164 interferon-stimulated genes “IFN stim AM”. Proliferating macrophages were delineated  
165 by high expression of a gene module representing the cellular proliferation response  
166 (Chandran et al., 2022) (Figure 3a-d).

167 Monocyte-like cells are present in healthy airspaces, and suggested by trajectory  
168 inference and increasing expression of macrophage marker genes over pseudotime  
169 to differentiate into AM, implying constant trafficking of monocytes into the lung (Mould  
170 et al., 2021). Consistent with this, we identified *CD14*, *FCN1* expressing classical  
171 monocytes (*FCN1*-Mono) (Mould et al., 2021; Wauters et al., 2021) characterized by  
172 high levels of *CCR2*, the receptor for monocyte chemoattractant protein, suggestive  
173 of recent recruitment from the peripheral blood (Auffray et al., 2009) (Figure 3c,d). A  
174 second *LGMM* and *SPP1* expressing subset (*LGMM*-Mono), recently identified as a  
175 rare population defined by expression of cell-matrix interaction genes in healthy  
176 airspaces (Mould et al., 2021), was also present (Figure 3c,d). In contrast to acute  
177 severe COVID-19 where proinflammatory monocytes and profibrotic *SPP1*, *LGMM*  
178 expressing macrophages have been reported to be abundant (Liao et al., 2020;  
179 Wendisch et al., 2021), monocytes represented a minor constituent of PCLD BAL.  
180 Neither subset expressed high levels of inflammatory mediators (Figure 3c,d) and very  
181 few cells expressed a gene signature characteristic of profibrotic macrophages  
182 recently identified in idiopathic pulmonary fibrosis (Adams et al., 2020), (Figure 3e and  
183 Supplementary Figure 7a).

184 No differences in the relative proportions of any of the myeloid populations were  
185 evident between the two PCLD phenotypes (Figure 3f). Very few gene expression  
186 differences were detected between the two phenotypes by pseudobulk analysis of  
187 macrophage or monocyte subsets (Supplementary Table 2). Similar to the analysis of



188 the full dataset stratified by broad cell type, re-clustering macrophages to identify more  
189 discrete sub-populations did not reveal transcriptomic differences between  
190 inflammatory and fibrotic PCLD.

191 Single-cell differential gene expression analysis revealed weak enrichment for  
192 immune response and cellular metabolism pathways in both groups (Supplementary  
193 Figure 7b,c). Minor enrichment for TGF $\beta$ -mediated signalling was evident for genes  
194 expressed at higher levels in AM, Inflamm-AM and *FCN1*-Mono in inflammatory PCLD  
195 (Supplementary Figure 7b). Proinflammatory cytokines, T cell activation factors, SPP1  
196 and TGF $\beta$  were identified as statistically enriched upstream regulators of differentially  
197 expressed genes in both monocyte populations in inflammatory PCLD  
198 (Supplementary Figure 8a,b,d,e). However, as for analysis at the level of broad cell  
199 types and refined T cell subsets, there was considerable overlap between molecules  
200 predicted to drive gene expression differences in each PCLD phenotype  
201 (Supplementary Figure 8c,f), suggesting that between group differential gene  
202 expression in this analysis did not represent differential biology between radiological  
203 patterns of disease.

#### 204 **Highly related TCRs indicate antigen-specific immune responses in PCLD**

205 To further evaluate T cell responses in PCLD we undertook single-cell TCR  
206 sequencing (scTCRseq) and compared the TCR repertoire in each radiological  
207 phenotype. We successfully obtained scTCRseq data for five fibrotic and three  
208 inflammatory cases. Increased T cell abundance in inflammatory PCLD may reflect  
209 increased numbers of unique T cell clones or increased expansion of individual clones.  
210 Expanded clonotypes identified by being present with a frequency of greater than one,  
211 were evident within the three major T cell subsets in both inflammatory and fibrotic

212 PCLD (Figure 4a). A greater proportion of CD4 TCM clones were expanded in the  
213 inflammatory phenotype, consistent with our observation of the higher abundance of  
214 this subset in this group. However, the proportion of expanded CD8 TEM and Treg  
215 clones was similar in both phenotypes (Figure 4b).

216 As T cell clonal expansion was evident in both PCLD phenotypes, we next sought to  
217 identify related TCRs for each group based on the similarity of their antigen specificity-  
218 determining complementarity determining region (CDR)3 amino acid sequences, on  
219 the premise that clusters of related TCRs recognize similar epitopes (details of the  
220 analysis are provided in the methods). We hypothesized that the inflammatory cases  
221 would exhibit more clustering than the fibrotic cases, given the trend towards a greater  
222 proportion of expanded CD4 TCM clones and increased abundance of both CD4 TCM  
223 and CD8 TEM in the inflammatory group. However, high levels of clustering were  
224 evident in both inflammatory and fibrotic PCLD. In benchmarking, this level of  
225 clustering was similar to that observed for expanded peripheral blood TCR clones  
226 detected following non-severe SARS-CoV-2 infection, and exceeded that in non-  
227 expanded TCRs from non-infected individuals from the same cohort (Chandran et al.,  
228 2022; Milighetti et al., 2023) (Figure 4c,d). In both radiological groups of PCLD the  
229 vast majority of clusters contained TCRs from multiple donors (Figure 4e) but there  
230 was minimal sharing of identical CDR3 sequences between different individuals  
231 (Supplementary Table 3). As a further comparison of inflammatory and fibrotic PCLD  
232 T cell repertoires we clustered CDR3 amino acid sequences from both groups  
233 together. Strikingly, most clusters contained TCRs from both inflammatory and fibrotic  
234 samples and multiple donors, suggesting the presence of T cell clones that recognize  
235 similar antigens across both phenotypes. A few small clusters composed uniquely of

236 either inflammatory or fibrotic PCLD TCRs were evident, indicative of subtle  
237 differences between the two repertoires (Figure 4f).

238 The high level of relatedness between TCRs in PCLD is suggestive of antigen-specific  
239 immune responses. We therefore sought to determine whether these repertoires were  
240 enriched for T cells specific for SARS-CoV-2 by comparison to other common viruses.  
241 Of the SARS-CoV-2-reactive TCRs identified in the VDJdb database, six were present  
242 in TCR data from inflammatory PCLD and eight in fibrotic PCLD. None were identified  
243 in equivalent sized healthy peripheral blood repertoires. However, fewer SARS-CoV-  
244 2-specific-TCRs were detected than Epstein-Barr virus (EBV)-specific or  
245 cytomegalovirus (CMV)-specific sequences, indicating no enrichment for SARS-CoV-  
246 2-specific T cells at the site of disease. There was no enrichment for SARS-CoV-2-  
247 reactive or EBV-reactive TCRs in inflammatory compared to fibrotic PCLD. However,  
248 CMV-specific TCRs were significantly enriched in the fibrotic group (Figure 4g). TCRs  
249 found in clusters composed uniquely of either PCLD phenotype were not enriched for  
250 known virus reactive-sequences (Supplementary Table 4).

## 251 **DISCUSSION**

252 We report the first comparative molecular analysis of cells sampled by bronchoalveolar  
253 lavage from patients displaying either predominantly inflammatory or fibrotic  
254 pulmonary radiological sequelae following COVID-19. The bronchoalveolar  
255 environment of inflammatory PCLD was characterised by significantly increased  
256 abundance of CD4 central memory and CD8 effector memory T cells compared to  
257 fibrotic PCLD. Clustering of similar TCRs from different donors, far exceeding that  
258 observed in healthy peripheral blood, was evident in both radiological phenotypes,  
259 suggestive of an antigen-specific immune response localised to the lung. The

260 transcriptomes of post-COVID radiological inflammation and fibrosis were highly  
261 similar for all bronchoalveolar cell types, dominated by cellular processes involved in  
262 inflammatory and immune responses. We found no robust evidence of enhanced  
263 activity of tissue damage or wound repair pathways in those with fibrotic radiological  
264 changes. Although many cell type-specific differentially expressed genes were  
265 identified between the two radiological phenotypes by single-cell methods, there were  
266 no systematic differences in enriched biological pathways or their upstream regulators  
267 among these differentially expressed genes. Furthermore, almost no differences in  
268 gene expression between the fibrotic and the inflammatory groups were detected if  
269 gene expression within cell types was aggregated by donor before differential analysis  
270 (Squair et al., 2021). Our data lead us to propose that the two radiological phenotypes  
271 represent distinct manifestations of a similar pathological process.

272 T cell infiltration has been a consistent finding in recent studies which have examined  
273 the post-COVID-19 airspaces; almost exclusively within 3-6 months of the acute insult,  
274 when radiological inflammation is more common than fibrosis (Cheon et al., 2021;  
275 Gagiannis et al., 2023; Ravaglia et al., 2022; Vijayakumar et al., 2022). The cellular  
276 proportions of our fibrotic PCLD samples, harvested at 9-12 months after acute illness,  
277 were akin to those reported in BAL samples from healthy individuals, with  
278 macrophages comprising greater than 80% and lymphocytes less than 15% of cells  
279 (Mould et al., 2021; The BAL Cooperative Group Steering Committee, 1990). This is  
280 in keeping with the reported repopulation of the airspaces by AM in the later stages of  
281 COVID-19 acute respiratory distress syndrome (ARDS) (Wendisch et al., 2021).  
282 Minimal data currently available for longitudinal samples obtained at approximately  
283 one year post-infection also suggest a trajectory of gradual normalization of molecular

284 abnormalities and airspace cellular composition (Vijayakumar et al., 2022).  
285 Nonetheless there is considerable interest in therapeutic intervention to expedite  
286 resolution of subacute inflammation, to prevent progression to fibrosis with  
287 concomitant irreversible tissue damage in susceptible individuals. Our findings  
288 suggest therapies which target T cells, rather than anti-fibrotic agents could be  
289 beneficial in PCLD, particularly in those with radiological inflammation. In support of  
290 this premise, one small uncontrolled clinical study demonstrated improvement in  
291 clinical symptoms, physiological parameters and radiological abnormalities, following  
292 three weeks of corticosteroid treatment instituted approximately three months post-  
293 COVID-19 (Myall et al., 2021).

294 The bronchoalveolar TCR repertoire from both PCLD phenotypes exhibited high levels  
295 of relatedness, suggestive of antigen-specific immune responses. In addition, the high  
296 proportion of clusters containing TCRs from multiple donors suggests immune  
297 responses against similar antigens, despite almost no sharing of identical TCR  
298 sequences between different individuals. Aberrant immune responses to persistent  
299 reservoirs of virus have been posited as drivers of post-acute sequelae of SARS-CoV-  
300 2 infection (Cheung et al., 2022; Merad et al., 2022; Stein et al., 2022). However, even  
301 including all detected TCRs, to offset the inherent sparsity of single-cell data, there  
302 was no enrichment for known SARS-CoV-2-specific T cell clones compared to TCRs  
303 specific for other common viruses. Hence, based on the current compendium of  
304 SARS-CoV-2-reactive TCRs (Bagaev et al., 2020), which may not be comprehensive,  
305 there was no evidence for viral persistence at the site of disease in our cohort. A more  
306 plausible hypothesis, given reports of cross-reactivity between SARS-CoV-2 and  
307 human antigens (Nunez-Castilla et al., 2022; Vojdani and Kharrazian, 2020), is that

308 the PCLD TCR repertoire is directed against as yet unknown respiratory autoantigens.  
309 Identifying the antigenic targets of the PCLD T cell repertoire may present  
310 opportunities for more specific therapeutic interventions.

311 Pro-fibrotic macrophages have been implicated in the pathogenesis of severe COVID-  
312 19 ARDS, which has been associated with rapid onset pulmonary fibrosis, which  
313 improves over time (Wendisch et al., 2021). Minimal interstitial fibrosis and the  
314 presence of pro-fibrotic macrophages have also been reported in transbronchial lung  
315 biopsies from a subset of individuals sampled at least 12 weeks after mild COVID-19  
316 (Gagiannis et al., 2023). However, there was no difference between the frequency at  
317 which mild fibrotic features were detected in the PCLD group and pre-pandemic  
318 autopsy samples from individuals who had died of non-respiratory causes (Gagiannis  
319 et al., 2023). In our study, which encompassed a broad range of severity of acute  
320 disease, including several individuals with COVID-19 ARDS, the phenotype of myeloid  
321 cells in both radiological groups was consistent with the spectrum of macrophages  
322 and monocytes found in healthy airspaces (Mould et al., 2021); with no convincing  
323 evidence for exaggerated activity of pro-fibrogenic pathways. The heterogeneity of  
324 disease phenotype and longer time interval after acute illness at which our cohort were  
325 sampled may account for this discrepancy. Of note, CMV-specific T cell clones were  
326 enriched in individuals with fibrotic PCLD, consistent with the repeated association of  
327 CMV with pulmonary fibrosis (Moore and Moore, 2015). However, this observation is  
328 of uncertain significance, given the lack of existing evidence for a direct role for CMV  
329 in causing human pulmonary fibrosis (Moore and Moore, 2015).

330 Our study has some limitations. We acknowledge a small sample size, heterogeneous  
331 patient cohort, and lack of specimens for histological correlation and orthogonal

332 validation of our single-cell data. Our findings provide early mechanistic insights, are  
333 hypothesis-generating and will require further validation in larger cohorts. Those with  
334 fibrotic radiological appearances were sampled later after acute disease than those  
335 with radiological inflammation. Ideally, we would have more closely matched the  
336 interval after acute COVID-19 at which both groups were sampled. However, the  
337 introduction of dexamethasone treatment early in the second wave of the pandemic  
338 was coincident with reduced numbers of individuals with persistent respiratory  
339 symptoms and radiological abnormalities. Consequently, we extended the interval  
340 after acute illness within which individuals were eligible for sampling. Since our aim  
341 was to evaluate whether single-cell profiling of the bronchoalveolar environment of  
342 individuals with inflammatory and fibrotic radiological patterns of PCLD at the time of  
343 sampling would reveal different immunopathogenic mechanisms for these  
344 phenotypes, we believe our approach remains valid. It also provided invaluable  
345 opportunities to assess respiratory tract samples from the later stages of PCLD which  
346 have received minimal attention to date. This was a cross-sectional evaluation of  
347 bronchoalveolar immune cells, which did not allow assessment of the temporal  
348 evolution of the immune response in PCLD within individuals. Future studies  
349 encompassing longitudinal monitoring of the bronchoalveolar environment might  
350 provide important insights into the molecular mechanisms driving resolution and  
351 whether this trajectory is a universal phenomenon for both inflammation and fibrosis  
352 following COVID-19. Augmented neutrophil-associated immune signatures have been  
353 described in plasma and nasal samples in individuals with post-COVID pulmonary  
354 sequelae, however, neutrophils were not detected in our samples, possibly due to the  
355 Chromium 10x Genomics sample processing conditions used at the time of our



356 analysis (George et al., 2022). Finally, due to technical limitations because of the low  
357 numbers of T cells present in BAL samples, we were unable to obtain TCR data for  
358 two inflammatory cases. Nonetheless, our data provide strong support for the notion  
359 that the TCR repertoire of PCLD reflects antigen-directed immune responses.

360 Our observations that inflammatory PCLD is characterised by airway T cell infiltration  
361 and that antigen-specific T cell responses are evident in both radiological phenotypes,  
362 highlight opportunities for early intervention with therapies targeting T cells.  
363 Understanding the timing and duration of intervention, stratification of those at high  
364 risk of irreversible tissue damage and the potential use of more targeted T cell  
365 immunomodulators all merit further investigation.

## 366 **METHODS**

### 367 **Ethics statement**

368 The study was approved by the North London Research Ethics Committee  
369 (13/LO/0900). Written informed consent was obtained from all participants. Subject  
370 identifiers were not known to anyone outside the research group.

### 371 **Study design and eligibility**

372 Immune cells from the site of disease were obtained from adults ( $\geq 18$  years)  
373 undergoing bronchoscopy for clinical investigation of persistent respiratory symptoms  
374 and CT abnormalities consistent with pulmonary inflammation ( $n=5$ ) or fibrosis ( $n=5$ )  
375 at least 12 weeks after acute COVID-19, confirmed by a positive SARS-CoV-2  
376 antibody or polymerase chain reaction (PCR) test. PCLD was defined in this cohort  
377 based on the following criteria: 1) new, persistent respiratory symptoms following  
378 SARS-CoV-2 infection at least 12 weeks previously, 2) post-COVID-19 residual lung  
379 abnormalities with more than 10% lung involvement on CT and 3) breathlessness in



380 keeping with the CT changes and not explained by other causes. Thoracic CT scans  
381 were classified as predominantly inflammatory or fibrotic by consensus opinion of the  
382 ILD multi-disciplinary team, which included thoracic radiologists with ILD expertise.  
383 Radiological inflammation was defined as consolidation or ground glass opacities  
384 without reticulation or parenchymal distortion and fibrosis defined as reticulation or  
385 traction bronchiectasis. Individuals with evidence of ILD prior to COVID-19, those with  
386 coincident malignancy, human immunodeficiency virus infection, bacterial, viral or  
387 fungal respiratory tract infection, taking immunomodulatory therapy, or unable to give  
388 informed consent were excluded.

### 389 **Isolation of bronchoalveolar cells**

390 Flexible fibreoptic bronchoscopy was used to obtain BAL samples by instillation of  
391 180-240 ml of warmed normal saline into a lung segment affected by the predominant  
392 radiological abnormality. Aspirated BAL fluid was cooled to 4°C and filtered through a  
393 cell strainer to remove particulate debris before centrifugation. After removal of the  
394 supernatant, cells were resuspended in PBS. Cell count and viability were determined  
395 by Trypan blue staining and erythrocytes removed where indicated, using ammonium-  
396 chloride-potassium red cell lysis buffer. Cells were resuspended at  $2 \times 10^6$  per ml for  
397 immediate downstream processing.

### 398 **scRNAseq and scTCRseq library preparation and sequencing**

399 20,000 cells per sample were loaded on to the Chromium controller (10x Genomics)  
400 to generate single-cell gel beads in emulsion (GEMs). Single-cell partitioning, reverse  
401 transcription, cDNA amplification and library construction were performed using the  
402 Chromium Single-cell 5' Reagent kits v1.1 and v2 (10x Genomics) according to the  
403 manufacturer's instructions. T cell receptor (TCR) V(D)J segments were enriched from

404 amplified cDNA using Chromium Single-Cell V(D)J Enrichment kits v1.1 and v2 (10x  
405 Genomics) per the manufacturer's protocol. Libraries were quality checked and  
406 quantified using the High Sensitivity DNA kit and 4200 TapeStation (Agilent).  
407 Sequencing was performed in paired end mode with SP100, P2 and P3 flow cells (100  
408 cycles) using NovaSeq 6000 and NextSeq 2000 systems (Illumina).

#### 409 **scRNAseq data analysis**

##### 410 **Cell Ranger**

411 Raw sequencing files were demultiplexed using BCL Convert v3.7.5 (Illumina) or Cell  
412 Ranger version 6.1.1 using the "mkfastq" script. Transcript alignment and quantitation  
413 against the GRCh38 human genome assembly was performed using Cell Ranger  
414 "multi" for samples with gene expression and T cell VDJ data or Cell Ranger "count"  
415 for samples with gene expression data only.

##### 416 **Quality control**

417 Initial processing of Cell Ranger output data was performed using Seurat v4.1.0 in R  
418 4.1.1 (Stuart et al., 2019). Cell Ranger output files were loaded using the "Read10x"  
419 function. Low quality cells with less than 200 or more than 6000 unique features or  
420 more than 10% mitochondrial genes were removed; 57,712 cells were retained for  
421 downstream analysis.

##### 422 **Normalization, feature selection and integration**

423 For each sample data were normalized and highly variable genes selected before  
424 integration to remove donor-specific batch effects, using the following Seurat functions  
425 implemented with default parameters; NormalizeData (normalization.method =  
426 "LogNormalize), FindVariableFeatures (selection.method = "vst", nfeatures = 2000),  
427 IntegrateData (anchorset = immune.anchors).

## 428 **Dimensional reduction, clustering and annotation**

429 Data were then scaled using the Seurat ScaleData function and dimensional reduction  
430 achieved by principal component analysis (PCA) of the most variable genes using  
431 RunPCA. The first 25 principal components (PCs) were used to generate the Uniform  
432 Manifold Approximation and Projection (UMAP) for two-dimensional visualization of  
433 the cells (RunUMAP) and for nearest neighbor graph construction (FindNeighbors)  
434 and Louvain clustering (FindClusters) using a resolution of 0.8. This clustering  
435 resolution was selected on the basis that it successfully partitioned single-cell  
436 transcriptomes into the broad cell types expected to be present in BAL. Automatic cell  
437 type annotation of clusters was performed with the Semi-supervised Category  
438 Identification and Assignment (SCINA) R package using gene signatures from the  
439 Azimuth human lung v1 reference  
440 (<https://azimuth.hubmapconsortium.org/references/#Human-Lungv1>) (Travaglini et  
441 al., 2020; Zhang et al., 2019). Additional manual annotation of dendritic cells and B  
442 cells was performed using literature-based markers (Cheng et al., 2021; Glass et al.,  
443 2020; Villani et al., 2017). A population with low numbers of genes, which could not be  
444 annotated by automatic or manual methods and likely represents empty droplets  
445 containing ambient RNA, was removed after clustering. To validate our clustering and  
446 annotation strategy, we visualized the expression of canonical or published marker  
447 genes for each cell type using a dot plot (Adams et al., 2020; Cheng et al., 2021; David  
448 et al., 2021; Davies et al., 2013; Davis and Wypych, 2021; Gardell and Parker, 2017;  
449 Glass et al., 2020; Murray and Wynn, 2011; Tsyklauri et al., 2023; van Aalderen et al.,  
450 2021; Villani et al., 2017).

## 451 **T cell and macrophage re-clustering**

452 For separate analyses of T cells only and macrophages only, cells in the relevant  
453 clusters were subsetted and normalization, variable feature selection, integration, data  
454 scaling, PCA, UMAP generation and Louvain clustering repeated. The first 25 PCs  
455 were used for data integration and clustering for both macrophages and T cells. The  
456 k.weight parameter was reduced to 70 for the T cell integration step in order to take  
457 account of the low number of cells in sample 12. Resolution 0.4 was used for re-  
458 clustering T cells and resolution 0.7 for re-clustering macrophages. T cell subsets were  
459 annotated using SCINA with Azimuth human PBMC reference marker genes  
460 <https://azimuth.hubmapconsortium.org/references/#Human-PBMC> and additional  
461 published CD4 T cell signatures (Cano-Gamez et al., 2020; Zhang et al., 2019).  
462 Macrophages were annotated using SCINA with Azimuth human lung v1 reference  
463 marker genes and additional signatures derived from published literature (Mould et al.,  
464 2021; Travaglini et al., 2020; Wendisch et al., 2021; Zhang et al., 2019).

## 465 **Calculation of gene module scores**

466 The Seurat function AddModuleScore was used to calculate enrichment of a cyclin D1  
467 (CCND1) regulated module representing the cellular proliferation response (Chandran  
468 et al., 2022) and a profibrotic macrophage gene module derived from idiopathic  
469 pulmonary fibrosis (Adams et al., 2020). Module scores represent the average  
470 expression of gene signatures of interest with subtraction of the average expression  
471 of control gene sets randomly selected from each expression bin which contains a  
472 module gene.

## 473 **Differential gene expression and differential cell type abundance analysis**

474 For comparison of gene expression in individual cells (single-cell method) the scan R

475 package findMarkers function was implemented using the following settings: test.type  
476 = "wilcox", direction = "up", pval.type = "all", lfc = 0. For identification of cell type  
477 (cluster) marker genes, sample was included as a blocking factor. Genes with an  
478 adjusted p-value <0.05 were considered significantly differentially expressed. For  
479 comparison of gene expression at cell type level (pseudobulk method) the scuttle R  
480 package aggregateAcrossCells function was used to aggregate counts for each cell  
481 type within each sample to create "pseudobulks" before statistical analysis was  
482 performed. Differentially expressed genes were identified using the scran  
483 pseudoBulkDGE function, implementing the edgeR negative binomial generalized  
484 linear model with quasi-likelihood F test (GLM-QLF) (Robinson et al., 2010). Genes  
485 with an adjusted p-value <0.05 were considered significant. Differences in cell type  
486 abundance between inflammatory and fibrotic PCLD were identified using the edgeR  
487 GLM-QLF test implemented by scran. Cell types with an adjusted p-value <0.05 were  
488 considered differentially abundant.

#### 489 **Pathway enrichment analysis**

490 The biological pathways represented by differentially expressed genes were identified  
491 by Reactome pathway enrichment analysis using XGR as previously described (Fang  
492 et al., 2016; Turner et al., 2021). For visualization, 15 pathway groups were identified  
493 by hierarchical clustering of Jaccard indices to quantify similarity between the gene  
494 compositions of each pathway. For each group the pathway term with the largest  
495 number of annotated genes was then selected as representative of the enriched  
496 biology.

#### 497 **Upstream regulator analysis**

498 Ingenuity Pathway Analysis (Qiagen) was used to identify upstream transcriptional

499 regulation of differentially expressed genes. This analysis was restricted to molecules  
500 annotated with the following functions: cytokine, growth factor, transmembrane  
501 receptor, kinase and transcriptional regulator, representing the canonical components  
502 of pathways which execute transcriptional reprogramming in immune and tissue repair  
503 responses. Enriched molecules with an adjusted p-value <0.05 were considered  
504 statistically significant. Area-proportional Venn diagrams visualizing the overlap  
505 between molecules predicted to regulate cell type-specific differentially expressed  
506 genes in inflammatory PCLD and fibrotic PCLD were generated using BioVenn  
507 (Hulsen et al., 2008).

#### 508 **TCR quantitation and CDR3 clustering**

509 TCR sequences were assembled by the Cell Ranger multi pipeline (v6.1.1). For single-  
510 cell TCR analysis, TCR clonotype abundance information was imported directly from  
511 Cell Ranger “filtered\_contig\_annotations” output files, where clonotype identity was  
512 determined as cells with identical V(D)J and CDR3 sequences. Clonotypes were  
513 assigned to single cells using index barcodes. TCRs found more than once were  
514 defined as expanded. Density plots were calculated using the UMAP coordinates of  
515 every expanded cell with a detectable TCR using geom\_density\_2d from the ggplot2  
516 package.

517 For clustering analysis of each PCLD phenotype individually, all detected alpha and  
518 beta chain sequences in the inflammatory samples were included, to take account of  
519 the sparsity of single-cell data. Including larger numbers of TCR sequences leads to  
520 more clustering (Madi et al., 2017); fibrotic PCLD and control group TCR sequences  
521 were therefore subsampled to match the number of sequences in the inflammatory  
522 PCLD group, which contained the smallest repertoire. We included expanded

523 peripheral blood TCRs from individuals with non-severe SARS-CoV-2 infection as a  
524 positive control dataset known to exhibit high levels of clustering and non-expanded  
525 TCRs randomly selected from uninfected individuals from this same cohort, as a  
526 negative control dataset, not expected to cluster highly (Chandran et al., 2022;  
527 Milighetti et al., 2023). For the combined analysis of both PCLD phenotypes all  
528 detected CDR3 sequences were included. TCR clustering was performed as  
529 previously described (Joshi et al., 2019). Briefly, CDR3 amino acid sequences were  
530 deconstructed into overlapping series of contiguous triplets. Pairwise similarity  
531 between two CDR3s was calculated as the normalized string (triplet) kernel using the  
532 Kernlab R package (Karatzoglou et al., 2004). The resulting TCR similarity matrix was  
533 converted into a network diagram in which CDR3s with a pairwise similarity above a  
534 designated threshold were connected by an edge using the iGraph R package (Csardi  
535 and Nepusz, 2006). We visualized thresholds at which PCLD TCRs exhibited the  
536 largest increase in the percentage of TCRs clustering compared to negative control  
537 TCR data for clustering of PCLD groups individually. For combined clustering of  
538 inflammatory and fibrotic PCLD we visualized thresholds at which the largest clusters  
539 composed uniquely of one phenotype were present.

#### 540 **Virus specific TCR enrichment analysis**

541 TCRs annotated for SARS-CoV-2, CMV and EBV were obtained from the VDJDdb  
542 database (Bagaev et al., 2020) (<https://vdjdb.cdr3.net/>), accessed on 1st November  
543 2021. The number of annotated sequences for each virus in VDJDdb either matching  
544 or not matching TCRs detected in inflammatory and fibrotic PCLD or the negative  
545 controls was used to calculate the odds ratio (Fisher's exact test) for enrichment of  
546 virus-specific TCRs in each group.



## 547 **Data availability**

548 scRNAseq and scTCRseq data will be available in the Gene Expression Omnibus  
549 (GEO) database at the time of peer-reviewed publication of the manuscript under  
550 accession number GSE228236.

## 551 **ACKNOWLEDGEMENTS**

552 We thank Dr Arjun Nair for oversight of the ILD MDT discussions to classify radiological  
553 changes as predominantly inflammatory or fibrotic and for identification of lung  
554 segments to be targeted for sampling by BAL.

## 555 **REFERENCES**

- 556 Adams TS, Schupp JC, Poli S, Ayaub EA, Neumark N, Ahangari F, Chu SG, Raby  
557 BA, Deluliis G, Januszyk M, Duan Q, Arnett HA, Siddiqui A, Washko GR,  
558 Homer R, Yan X, Rosas IO, Kaminski N. 2020. Single-cell RNA-seq reveals  
559 ectopic and aberrant lung-resident cell populations in idiopathic pulmonary  
560 fibrosis. *Sci Adv* **6**:eaba1983. doi:10.1126/sciadv.aba1983
- 561 Auffray C, Sieweke MH, Geissmann F. 2009. Blood monocytes: development,  
562 heterogeneity, and relationship with dendritic cells. *Annu Rev Immunol*  
563 **27**:669–692. doi:10.1146/annurev.immunol.021908.132557
- 564 Bagaev DV, Vroomans RMA, Samir J, Stervbo U, Rius C, Dolton G, Greenshields-  
565 Watson A, Attaf M, Egorov ES, Zvyagin IV, Babel N, Cole DK, Godkin AJ,  
566 Sewell AK, Kesmir C, Chudakov DM, Luciani F, Shugay M. 2020. VDJdb in  
567 2019: database extension, new analysis infrastructure and a T-cell receptor  
568 motif compendium. *Nucleic Acids Res* **48**:D1057–D1062.  
569 doi:10.1093/nar/gkz874
- 570 Cano-Gamez E, Soskic B, Roumeliotis TI, So E, Smyth DJ, Baldrighi M, Willé D,  
571 Nakic N, Esparza-Gordillo J, Larminie CGC, Bronson PG, Tough DF, Rowan  
572 WC, Choudhary JS, Trynka G. 2020. Single-cell transcriptomics identifies an  
573 effectorness gradient shaping the response of CD4+ T cells to cytokines. *Nat*  
574 *Commun* **11**:1801. doi:10.1038/s41467-020-15543-y
- 575 Chandran A, Rosenheim J, Nageswaran G, Swadling L, Pollara G, Gupta RK, Burton  
576 AR, Guerra-Assunção JA, Woolston A, Ronel T, Pade C, Gibbons JM, Sanz-  
577 Magallon Duque De Estrada B, Robert de Massy M, Whelan M, Semper A,  
578 Brooks T, Altmann DM, Boyton RJ, McKnight Á, Captur G, Manisty C, Treibel  
579 TA, Moon JC, Tomlinson GS, Maini MK, Chain BM, Noursadeghi M,  
580 COVIDsortium Investigators. 2022. Rapid synchronous type 1 IFN and virus-  
581 specific T cell responses characterize first wave non-severe SARS-CoV-2  
582 infections. *Cell Rep Med* **3**:100557. doi:10.1016/j.xcrm.2022.100557
- 583 Cheng S, Li Z, Gao R, Xing B, Gao Y, Yang Yu, Qin S, Zhang L, Ouyang H, Du P,



- 584 Jiang L, Zhang B, Yang Yue, Wang X, Ren X, Bei J-X, Hu X, Bu Z, Ji J,  
585 Zhang Z. 2021. A pan-cancer single-cell transcriptional atlas of tumor  
586 infiltrating myeloid cells. *Cell* **184**:792-809.e23. doi:10.1016/j.cell.2021.01.010
- 587 Cheon IS, Li C, Son YM, Goplen NP, Wu Y, Cassmann T, Wang Z, Wei X, Tang J, Li  
588 Y, Marlow H, Hughes S, Hammel L, Cox TM, Goddery E, Ayasoufi K,  
589 Weiskopf D, Boonyaratanakornkit J, Dong H, Li H, Chakraborty R, Johnson  
590 AJ, Edell E, Taylor JJ, Kaplan MH, Sette A, Bartholmai BJ, Kern R, Vassallo  
591 R, Sun J. 2021. Immune signatures underlying post-acute COVID-19 lung  
592 sequelae. *Sci Immunol* **6**:eabk1741. doi:10.1126/sciimmunol.abk1741
- 593 Cheung CCL, Goh D, Lim X, Tien TZ, Lim JCT, Lee JN, Tan B, Tay ZEA, Wan WY,  
594 Chen EX, Nerurkar SN, Loong S, Cheow PC, Chan CY, Koh YX, Tan TT,  
595 Kalimuddin S, Tai WMD, Ng JL, Low JG-H, Yeong J, Lim KH. 2022. Residual  
596 SARS-CoV-2 viral antigens detected in GI and hepatic tissues from five  
597 recovered patients with COVID-19. *Gut* **71**:226–229. doi:10.1136/gutjnl-2021-  
598 324280
- 599 Csardi G, Nepusz T. 2006. The igraph software package for complex network  
600 research. *Complex Syst* **1695**:1–9.
- 601 David G, Willem C, Legrand N, Djaoud Z, Mérieau P, Walencik A, Guillaume T,  
602 Gagne K, Chevallier P, Retière C. 2021. Deciphering the biology of KIR2DL3+  
603 T lymphocytes that are associated to relapse in haploidentical HSCT. *Sci Rep*  
604 **11**:15782. doi:10.1038/s41598-021-95245-7
- 605 Davies LC, Jenkins SJ, Allen JE, Taylor PR. 2013. Tissue-resident macrophages.  
606 *Nat Immunol* **14**:986–995. doi:10.1038/ni.2705
- 607 Davis JD, Wypych TP. 2021. Cellular and functional heterogeneity of the airway  
608 epithelium. *Mucosal Immunol* **14**:978–990. doi:10.1038/s41385-020-00370-7
- 609 Fabbri L, Moss S, Khan FA, Chi W, Xia J, Robinson K, Smyth AR, Jenkins G,  
610 Stewart I. 2023. Parenchymal lung abnormalities following hospitalisation for  
611 COVID-19 and viral pneumonitis: a systematic review and meta-analysis.  
612 *Thorax* **78**:191–201. doi:10.1136/thoraxjnl-2021-218275
- 613 Fang H, Knezevic B, Burnham KL, Knight JC. 2016. XGR software for enhanced  
614 interpretation of genomic summary data, illustrated by application to  
615 immunological traits. *Genome Med* **8**:129. doi:10.1186/s13073-016-0384-y
- 616 Gagiannis D, Hackenbroch C, Bloch W, Zech F, Kirchhoff F, Djudjaj S, von Stillfried  
617 S, Bülow R, Boor P, Steinestel K. 2023. Clinical, Imaging, and  
618 Histopathological Features of Pulmonary Sequelae Following Mild COVID-19.  
619 *Am J Respir Crit Care Med*. doi:10.1164/rccm.202302-0285LE
- 620 Gardell JL, Parker DC. 2017. CD40L is transferred to antigen-presenting B cells  
621 during delivery of T-cell help. *Eur J Immunol* **47**:41–50.  
622 doi:10.1002/eji.201646504
- 623 George PM, Reed A, Desai SR, Devaraj A, Faiez TS, Lavery S, Kanwal A, Esneau  
624 C, Liu MKC, Kamal F, Man WD-C, Kaul S, Singh S, Lamb G, Faizi FK,  
625 Schuliga M, Read J, Burgoyne T, Pinto AL, Micallef J, Bauwens E, Candiracci  
626 J, Bougoussa M, Herzog M, Raman L, Ahmetaj-Shala B, Turville S, Aggarwal  
627 A, Farne HA, Dalla Pria A, Aswani AD, Patella F, Borek WE, Mitchell JA,  
628 Bartlett NW, Dokal A, Xu X-N, Kelleher P, Shah A, Singanayagam A. 2022. A  
629 persistent neutrophil-associated immune signature characterizes post-COVID-

- 630 19 pulmonary sequelae. *Sci Transl Med* **14**:eabo5795.  
631 doi:10.1126/scitranslmed.abo5795
- 632 Glass DR, Tsai AG, Oliveria JP, Hartmann FJ, Kimmey SC, Calderon AA, Borges L,  
633 Glass MC, Wagar LE, Davis MM, Bendall SC. 2020. An Integrated Multi-omic  
634 Single-Cell Atlas of Human B Cell Identity. *Immunity* **53**:217-232.e5.  
635 doi:10.1016/j.immuni.2020.06.013
- 636 Hulsen T, de Vlieg J, Alkema W. 2008. BioVenn - a web application for the  
637 comparison and visualization of biological lists using area-proportional Venn  
638 diagrams. *BMC Genomics* **9**:488. doi:10.1186/1471-2164-9-488
- 639 Joshi K, de Massy MR, Ismail M, Reading JL, Uddin I, Woolston A, Hatipoglu E,  
640 Oakes T, Rosenthal R, Peacock T, Ronel T, Noursadeghi M, Turati V,  
641 Furness AJS, Georgiou A, Wong YNS, Ben Aissa A, Sunderland MW, Jamal-  
642 Hanjani M, Veeriah S, Birkbak NJ, Wilson GA, Hiley CT, Ghorani E, Guerra-  
643 Assunção JA, Herrero J, Enver T, Hadrup SR, Hackshaw A, Peggs KS,  
644 McGranahan N, Swanton C, TRACERx consortium, Quezada SA, Chain B.  
645 2019. Spatial heterogeneity of the T cell receptor repertoire reflects the  
646 mutational landscape in lung cancer. *Nat Med* **25**:1549–1559.  
647 doi:10.1038/s41591-019-0592-2
- 648 Karatzoglou A, Smola A, Hornik K, Zeileis A. 2004. kernlab - An S4 Package for  
649 Kernel Methods in R. *J Stat Softw* **11**:1–20. doi:10.18637/jss.v011.i09
- 650 Liao M, Liu Y, Yuan J, Wen Y, Xu G, Zhao J, Cheng L, Li J, Wang X, Wang F, Liu L,  
651 Amit I, Zhang S, Zhang Z. 2020. Single-cell landscape of bronchoalveolar  
652 immune cells in patients with COVID-19. *Nat Med* **26**:842–844.  
653 doi:10.1038/s41591-020-0901-9
- 654 Madi A, Poran A, Shifrut E, Reich-Zeliger S, Greenstein E, Zaretsky I, Arnon T,  
655 Laethem FV, Singer A, Lu J, Sun PD, Cohen IR, Friedman N. 2017. T cell  
656 receptor repertoires of mice and humans are clustered in similarity networks  
657 around conserved public CDR3 sequences. *eLife* **6**:e22057.  
658 doi:10.7554/eLife.22057
- 659 Mehta P, Rosas IO, Singer M. 2022. Understanding post-COVID-19 interstitial lung  
660 disease (ILD): a new fibroinflammatory disease entity. *Intensive Care Med*  
661 **48**:1803–1806. doi:10.1007/s00134-022-06877-w
- 662 Merad M, Blish CA, Sallusto F, Iwasaki A. 2022. The immunology and  
663 immunopathology of COVID-19. *Science* **375**:1122–1127.  
664 doi:10.1126/science.abm8108
- 665 Milighetti M, Peng Y, Tan C, Mark M, Nageswaran G, Byrne S, Ronel T, Peacock T,  
666 Mayer A, Chandran A, Rosenheim J, Whelan M, Yao X, Liu G, Felce SL,  
667 Dong T, Mentzer AJ, Knight JC, Balloux F, Greenstein E, Reich-Zeliger S,  
668 Pade C, Gibbons JM, Semper A, Brooks T, Otter A, Altmann DM, Boyton RJ,  
669 Maini MK, McKnight A, Manisty C, Treibel TA, Moon JC, Noursadeghi M,  
670 Chain B. 2023. Large clones of pre-existing T cells drive early immunity  
671 against SARS-COV-2 and LCMV infection. *iScience* **26**.  
672 doi:10.1016/j.isci.2023.106937
- 673 Moore BB, Moore TA. 2015. Viruses in Idiopathic Pulmonary Fibrosis. Etiology and  
674 Exacerbation. *Ann Am Thorac Soc* **12** Suppl 2:S186-192.  
675 doi:10.1513/AnnalsATS.201502-088AW

- 676 Mould KJ, Moore CM, McManus SA, McCubbrey AL, McClendon JD, Griesmer CL,  
677 Henson PM, Janssen WJ. 2021. Airspace Macrophages and Monocytes Exist  
678 in Transcriptionally Distinct Subsets in Healthy Adults. *Am J Respir Crit Care*  
679 *Med* **203**:946–956. doi:10.1164/rccm.202005-1989OC
- 680 Murray PJ, Wynn TA. 2011. Protective and pathogenic functions of macrophage  
681 subsets. *Nat Rev Immunol* **11**:723–737. doi:10.1038/nri3073
- 682 Myall KJ, Mukherjee B, Castanheira AM, Lam JL, Benedetti G, Mak SM, Preston R,  
683 Thillai M, Dewar A, Molyneaux PL, West AG. 2021. Persistent Post-COVID-19  
684 Interstitial Lung Disease. An Observational Study of Corticosteroid Treatment.  
685 *Ann Am Thorac Soc* **18**:799–806. doi:10.1513/AnnalsATS.202008-1002OC
- 686 Nouno T, Okamoto M, Ohnishi K, Kaieda S, Tominaga M, Zaizen Y, Ichiki M,  
687 Momosaki S, Nakamura M, Fujimoto K, Fukuoka J, Shimizu S, Komohara Y,  
688 Hoshino T. 2019. Elevation of pulmonary CD163 + and CD204 +  
689 macrophages is associated with the clinical course of idiopathic pulmonary  
690 fibrosis patients. *J Thorac Dis* **11**. doi:10.21037/jtd.2019.09.03
- 691 Nunez-Castilla J, Stebliankin V, Baral P, Balbin CA, Sobhan M, Cickovski T, Mondal  
692 AM, Narasimhan G, Chapagain P, Mathee K, Siltberg-Liberles J. 2022.  
693 Potential Autoimmunity Resulting from Molecular Mimicry between SARS-  
694 CoV-2 Spike and Human Proteins. *Viruses* **14**:1415. doi:10.3390/v14071415
- 695 Ravaglia C, Doglioni C, Chilosi M, Piciucchi S, Dubini A, Rossi G, Pedica F, Puglisi  
696 S, Donati L, Tomassetti S, Poletti V. 2022. Clinical, radiological and  
697 pathological findings in patients with persistent lung disease following SARS-  
698 CoV-2 infection. *Eur Respir J* **60**:2102411. doi:10.1183/13993003.02411-2021
- 699 Robinson MD, McCarthy DJ, Smyth GK. 2010. edgeR: a Bioconductor package for  
700 differential expression analysis of digital gene expression data. *Bioinforma*  
701 *Oxf Engl* **26**:139–140. doi:10.1093/bioinformatics/btp616
- 702 Squair JW, Gautier M, Kathe C, Anderson MA, James ND, Hutson TH, Hudelle R,  
703 Qaiser T, Matson KJE, Barraud Q, Levine AJ, La Manno G, Skinnider MA,  
704 Courtine G. 2021. Confronting false discoveries in single-cell differential  
705 expression. *Nat Commun* **12**:5692. doi:10.1038/s41467-021-25960-2
- 706 Stein SR, Ramelli SC, Grazioli A, Chung J-Y, Singh M, Yinda CK, Winkler CW, Sun  
707 J, Dickey JM, Ylaya K, Ko SH, Platt AP, Burbelo PD, Quezado M, Pittaluga S,  
708 Purcell M, Munster VJ, Belinky F, Ramos-Benitez MJ, Boritz EA, Lach IA,  
709 Herr DL, Rabin J, Saharia KK, Madathil RJ, Tabatabai A, Soherwardi S,  
710 McCurdy MT, NIH COVID-19 Autopsy Consortium, Peterson KE, Cohen JI, de  
711 Wit E, Vannella KM, Hewitt SM, Kleiner DE, Chertow DS. 2022. SARS-CoV-2  
712 infection and persistence in the human body and brain at autopsy. *Nature*  
713 **612**:758–763. doi:10.1038/s41586-022-05542-y
- 714 Stewart I, Jacob J, George PM, Molyneaux PL, Porter JC, Allen RJ, Aslani S, Baillie  
715 JK, Barratt SL, Beirne P, Bianchi SM, Blaikley JF, Chalmers JD, Chambers  
716 RC, Chaudhuri N, Coleman C, Collier G, Denny EK, Docherty A, Elneima  
717 O, Evans RA, Fabbri L, Gibbons MA, Gleeson FV, Goptu B, Greening NJ,  
718 Guillen Guio B, Hall IP, Hanley NA, Harris V, Harrison EM, Heightman M,  
719 Hillman TE, Horsley A, Houchen-Wolloff L, Jarrold I, Johnson SR, Jones MG,  
720 Khan F, Lawson R, Leavy O, Lone N, Marks M, McAuley H, Mehta P, Parekh  
721 D, Piper Hanley K, Platé M, Pearl J, Poinasamy K, Quint JK, Raman B,

- 722 Richardson M, Rivera-Ortega P, Saunders L, Saunders R, Semple MG,  
723 Sereno M, Shikotra A, Simpson AJ, Singapuri A, Smith DJ, Spears M,  
724 Spencer LG, Stanel S, Thickett D, Thompson AAR, Thorpe M, Walsh SL,  
725 Walker S, Weatherley ND, Weeks M, Wild JM, Wootton DG, Brightling CE, Ho  
726 L-P, Wain LV, Jenkins RG. 2022. Residual Lung Abnormalities Following  
727 COVID-19 Hospitalization: Interim Analysis of the UKILD Post-COVID Study.  
728 *Am J Respir Crit Care Med*. doi:10.1164/rccm.202203-0564OC
- 729 Stuart T, Butler A, Hoffman P, Hafemeister C, Papalexi E, Mauck WM, Hao Y,  
730 Stoeckius M, Smibert P, Satija R. 2019. Comprehensive Integration of Single-  
731 Cell Data. *Cell* **177**:1888-1902.e21. doi:10.1016/j.cell.2019.05.031
- 732 The BAL Cooperative Group Steering Committee. 1990. Bronchoalveolar lavage  
733 constituents in healthy individuals, idiopathic pulmonary fibrosis, and selected  
734 comparison groups. *Am Rev Respir Dis* **141**:S169-202.  
735 doi:10.1164/ajrccm/141.5\_Pt\_2.S169
- 736 Travaglini KJ, Nabhan AN, Penland L, Sinha R, Gillich A, Sit RV, Chang S, Conley  
737 SD, Mori Y, Seita J, Berry GJ, Shrager JB, Metzger RJ, Kuo CS, Neff N,  
738 Weissman IL, Quake SR, Krasnow MA. 2020. A molecular cell atlas of the  
739 human lung from single-cell RNA sequencing. *Nature* **587**:619–625.  
740 doi:10.1038/s41586-020-2922-4
- 741 Tsyklauri O, Chadimova T, Niederlova V, Kovarova J, Michalik J, Malatova I,  
742 Janusova S, Ivashchenko O, Rossez H, Drobek A, Vecerova H, Galati V,  
743 Kovar M, Stepanek O. 2023. Regulatory T cells suppress the formation of  
744 potent KLRK1 and IL-7R expressing effector CD8 T cells by limiting IL-2. *eLife*  
745 **12**:e79342. doi:10.7554/eLife.79342
- 746 Turner CT, Brown J, Shaw E, Uddin I, Tsaliki E, Roe JK, Pollara G, Sun Y, Heather  
747 JM, Lipman M, Chain B, Noursadeghi M. 2021. Persistent T Cell Repertoire  
748 Perturbation and T Cell Activation in HIV After Long Term Treatment. *Front*  
749 *Immunol* **12**:634489. doi:10.3389/fimmu.2021.634489
- 750 van Aalderen MC, van Lier RAW, Hombrink P. 2021. How to Reliably Define Human  
751 CD8+ T-Cell Subsets: Markers Playing Tricks. *Cold Spring Harb Perspect Biol*  
752 **13**:a037747. doi:10.1101/cshperspect.a037747
- 753 Vijayakumar B, Boustani K, Ogger PP, Papadaki A, Tonkin J, Orton CM, Ghai P,  
754 Suveizdyte K, Hewitt RJ, Desai SR, Devaraj A, Snelgrove RJ, Molyneaux PL,  
755 Garner JL, Peters JE, Shah PL, Lloyd CM, Harker JA. 2022. Immuno-  
756 proteomic profiling reveals aberrant immune cell regulation in the airways of  
757 individuals with ongoing post-COVID-19 respiratory disease. *Immunity*  
758 **55**:542-556.e5. doi:10.1016/j.immuni.2022.01.017
- 759 Villani A-C, Satija R, Reynolds G, Sarkizova S, Shekhar K, Fletcher J, Griesbeck M,  
760 Butler A, Zheng S, Lazo S, Jardine L, Dixon D, Stephenson E, Nilsson E,  
761 Grundberg I, McDonald D, Filby A, Li W, De Jager PL, Rozenblatt-Rosen O,  
762 Lane AA, Haniffa M, Regev A, Hacohen N. 2017. Single-cell RNA-seq reveals  
763 new types of human blood dendritic cells, monocytes, and progenitors.  
764 *Science* **356**:eaah4573. doi:10.1126/science.aah4573
- 765 Vojdani A, Kharratian D. 2020. Potential antigenic cross-reactivity between SARS-  
766 CoV-2 and human tissue with a possible link to an increase in autoimmune  
767 diseases. *Clin Immunol* **217**:108480. doi:10.1016/j.clim.2020.108480



- 768 Wauters E, Van Mol P, Garg AD, Jansen S, Van Herck Y, Vanderbeke L, Bassez A,  
769 Boeckx B, Malengier-Devlies B, Timmerman A, Van Brussel T, Van Buyten T,  
770 Schepers R, Heylen E, Dauwe D, Dooms C, Gunst J, Hermans G,  
771 Meersseman P, Testelmans D, Yserbyt J, Tejpar S, De Wever W, Matthys P,  
772 Neyts J, Wauters J, Qian J, Lambrechts D. 2021. Discriminating mild from  
773 critical COVID-19 by innate and adaptive immune single-cell profiling of  
774 bronchoalveolar lavages. *Cell Res* **31**:272–290. doi:10.1038/s41422-020-  
775 00455-9
- 776 Wendisch D, Dietrich O, Mari T, von Stillfried S, Ibarra IL, Mittermaier M, Mache C,  
777 Chua RL, Knoll R, Timm S, Brumhard S, Krammer T, Zauber H, Hiller AL,  
778 Pascual-Reguant A, Mothes R, Bülow RD, Schulze J, Leipold AM, Djudjaj S,  
779 Erhard F, Geffers R, Pott F, Kazmierski J, Radke J, Pergantis P, Baßler K,  
780 Conrad Claudia, Aschenbrenner AC, Sawitzki B, Landthaler M, Wyler E, Horst  
781 D, Deutsche COVID-19 OMICS Initiative (DeCOI), Hippenstiel S, Hocke A,  
782 Heppner FL, Uhrig A, Garcia C, Machleidt F, Herold S, Elezkurtaj S, Thibeault  
783 C, Witzenrath M, Cochain C, Suttorp N, Drosten C, Goffinet C, Kurth F,  
784 Schultze JL, Radbruch H, Ochs M, Eils R, Müller-Redetzky H, Hauser AE,  
785 Luecken MD, Theis FJ, Conrad Christian, Wolff T, Boor P, Selbach M, Saliba  
786 A-E, Sander LE. 2021. SARS-CoV-2 infection triggers profibrotic macrophage  
787 responses and lung fibrosis. *Cell* **184**:6243-6261.e27.  
788 doi:10.1016/j.cell.2021.11.033
- 789 Zhang Z, Luo D, Zhong X, Choi JH, Ma Y, Wang S, Mahrt E, Guo W, Stawiski EW,  
790 Modrusan Z, Seshagiri S, Kapur P, Hon GC, Brugarolas J, Wang T. 2019.  
791 SCINA: A Semi-Supervised Subtyping Algorithm of Single Cells and Bulk  
792 Samples. *Genes* **10**:531. doi:10.3390/genes10070531  
793

794 **FIGURES**

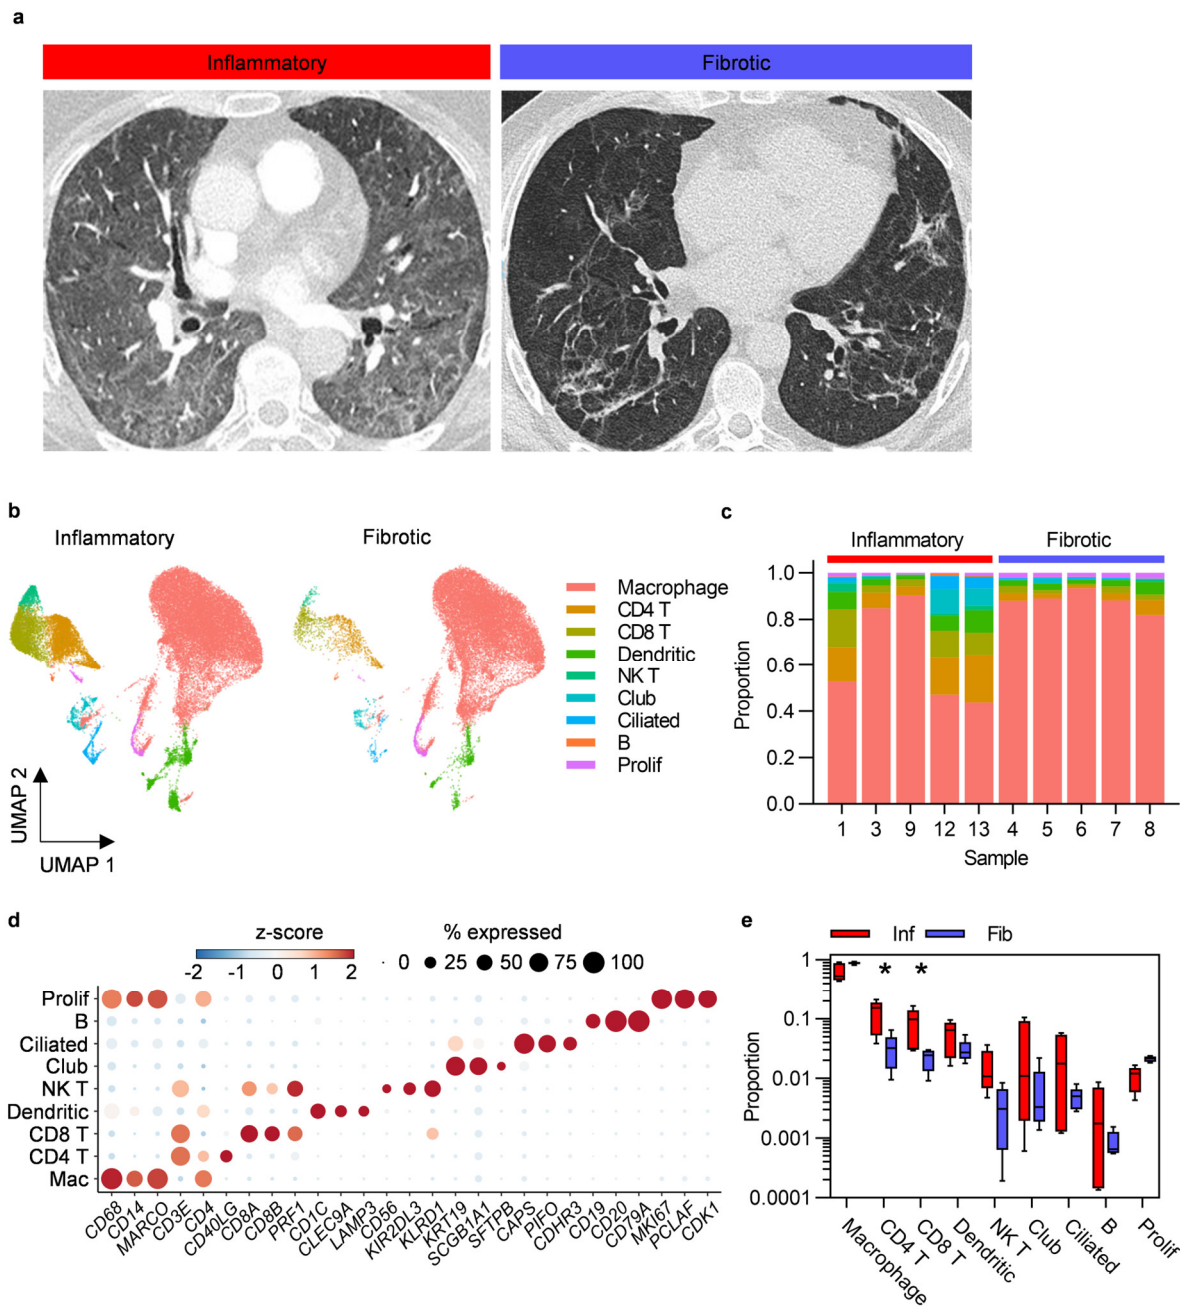

795

796 **Figure 1.** Higher abundance of bronchoalveolar T cells in inflammatory post-COVID-

797 19 lung disease (PCLD). **a** Representative computed tomography (CT) images for

798 each radiological phenotype. **b** Uniform manifold approximation and projection

799 (UMAP) embedding of 55,776 bronchoalveolar single-cell transcriptomes obtained

800 from five individuals with radiological features of pulmonary inflammation (33,553

30

801 cells) and five individuals with radiological features of pulmonary fibrosis (22,223 cells)  
802 following COVID-19, split by PCLD phenotype, color coded by cell type. Cell type  
803 annotation was achieved by assignment of Azimuth human lung reference gene  
804 signatures using the SCINA R package and in the case of dendritic cells and B cells,  
805 expression of literature-based markers. Prolif = proliferating cells, identified by their  
806 high module score for a gene signature representing the cellular proliferation  
807 response. **c** Cellular composition of each BAL sample defined by single-cell RNA  
808 sequencing (scRNAseq). Color indicates cell type and bar height represents  
809 proportion. **d** Dot plot visualization of the expression of independently established  
810 marker genes for each cell type; “Mac” = macrophage. Dot size represents the  
811 percentage of cells expressing the gene in each cell type, color shows the z-scores of  
812 average log-normalized expression for each cell type compared to the entire data set.  
813 **e** Comparison of the proportions of each cell type in inflammatory and fibrotic PCLD.  
814 Horizontal lines indicate median, box limits the interquartile range and whiskers the 5<sup>th</sup>  
815 to 95<sup>th</sup> percentiles, \* = FDR<0.05.  
816

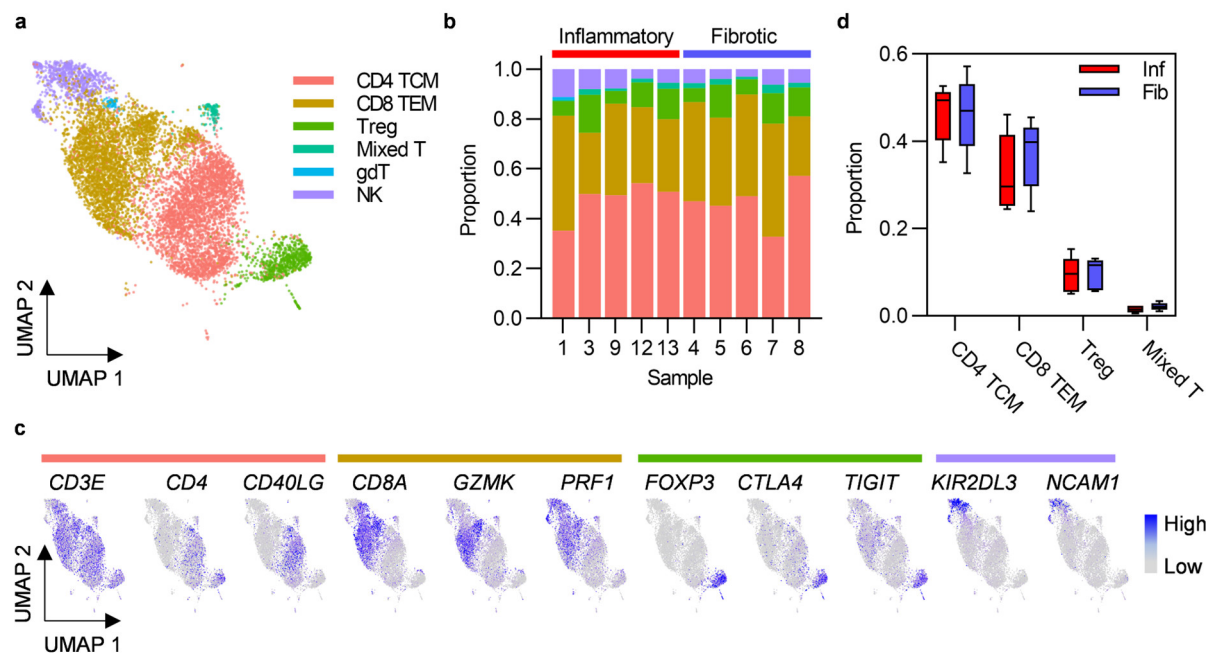

817

818 **Figure 2.** Post-COVID-19 bronchoalveolar T cells are dominated by CD4 central  
819 memory and CD8 effector memory subsets. **a** UMAP embedding of 9196  
820 transcriptomes of T cells identified in Figure 1b, colored by cell type. T cell subset  
821 annotation was based on assignment of Azimuth human PBMC reference marker  
822 gene signatures and additional published CD4 T cell signatures by the SCINA R  
823 package. **b** Relative proportions of each T cell subset in each subject, colors represent  
824 cell type. **c** Feature plots demonstrating the expression of marker genes for the three  
825 principal T cell subsets and NK cells, colored by scaled, log-normalized counts,  
826 projected on to the T cell UMAP. **d** Comparison of the proportions of T cell subsets  
827 found in all individuals in inflammatory and fibrotic post-COVID-19 lung disease  
828 (PCLD). Horizontal lines indicate median, box limits the interquartile range and  
829 whiskers the 5<sup>th</sup> to 95<sup>th</sup> percentiles.

830



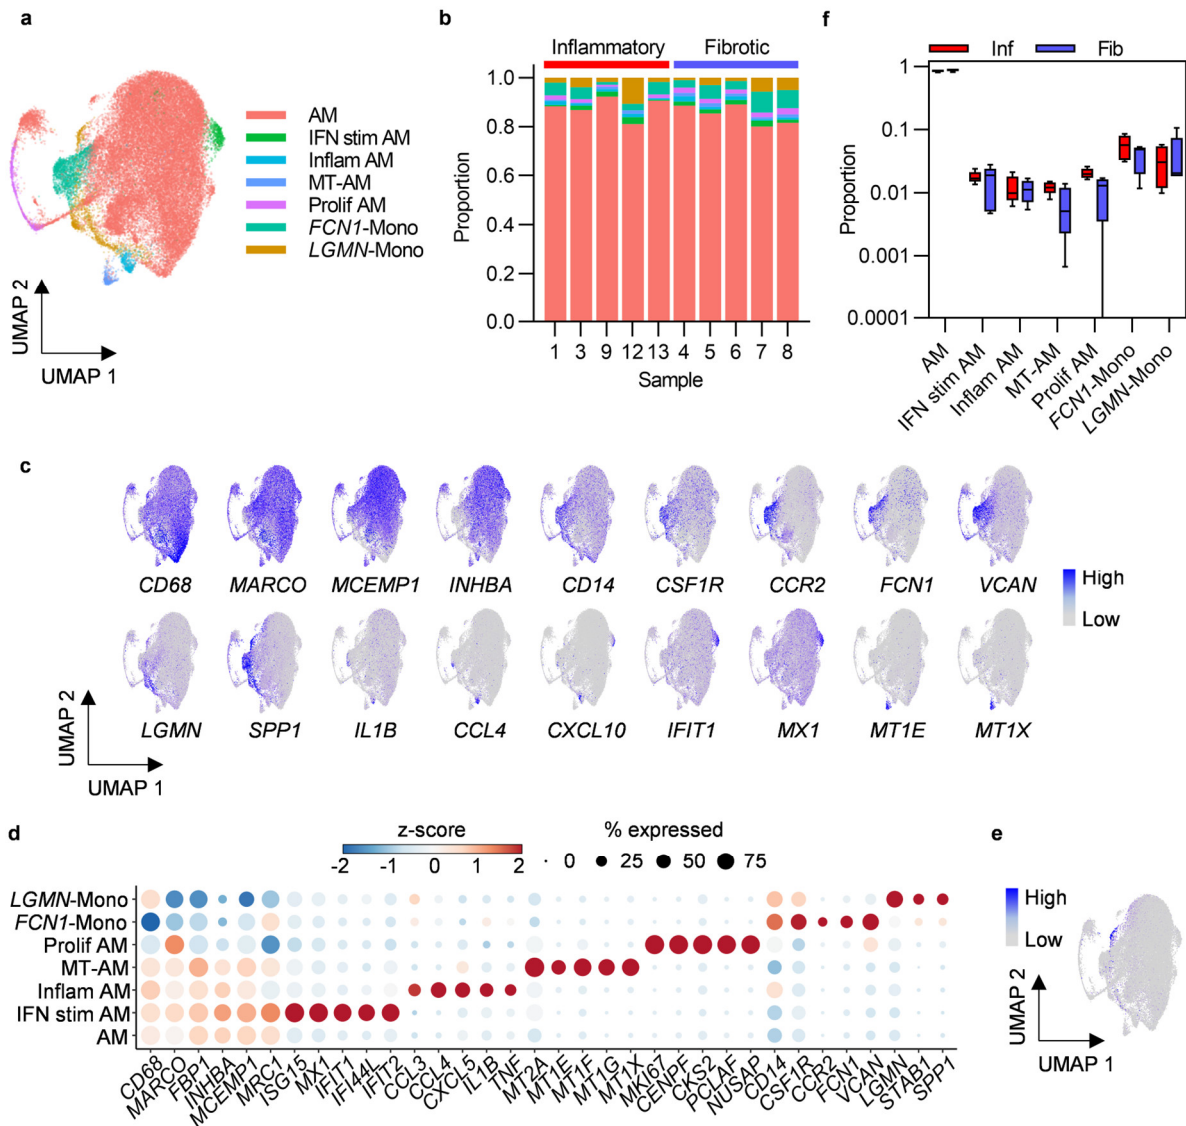

831

832 **Figure 3.** Bronchoalveolar macrophage and monocyte subsets in post-COVID-19 lung

833 disease (PCLD). **a** UMAP embedding of 38,010 macrophage transcriptomes identified

834 in Figure 1**b**, colored by cell type. Myeloid populations were annotated by assignment

835 of Azimuth human lung reference marker genes and additional signatures derived from

836 published literature using the SCINA R package and by visualising expression of

837 canonical marker genes for some subsets. **b** Relative proportions of each myeloid

838 subset within each individual, colors represent cell type. **c** Expression of marker genes

839 for PCLD macrophage and monocyte populations, colored by scaled, log-normalized

840 counts, projected on to the myeloid cell UMAP. **d** Dot plot visualization of the  
841 expression of selected marker genes for each macrophage and monocyte subset. Dot  
842 size represents the percentage of cells expressing the gene in each myeloid subset,  
843 color shows the z-scores of average log-normalized expression for each subset  
844 compared to the entire data set. **e** Expression of a profibrotic macrophage gene  
845 signature derived from idiopathic pulmonary fibrosis, calculated on a single-cell level,  
846 colored by module score and projected on to the macrophage UMAP. **f** Comparison  
847 of the proportions of bronchoalveolar myeloid populations in inflammatory and fibrotic  
848 PCLD. Horizontal lines indicate median, box limits the interquartile range and whiskers  
849 the 5<sup>th</sup> to 95<sup>th</sup> percentiles.

850

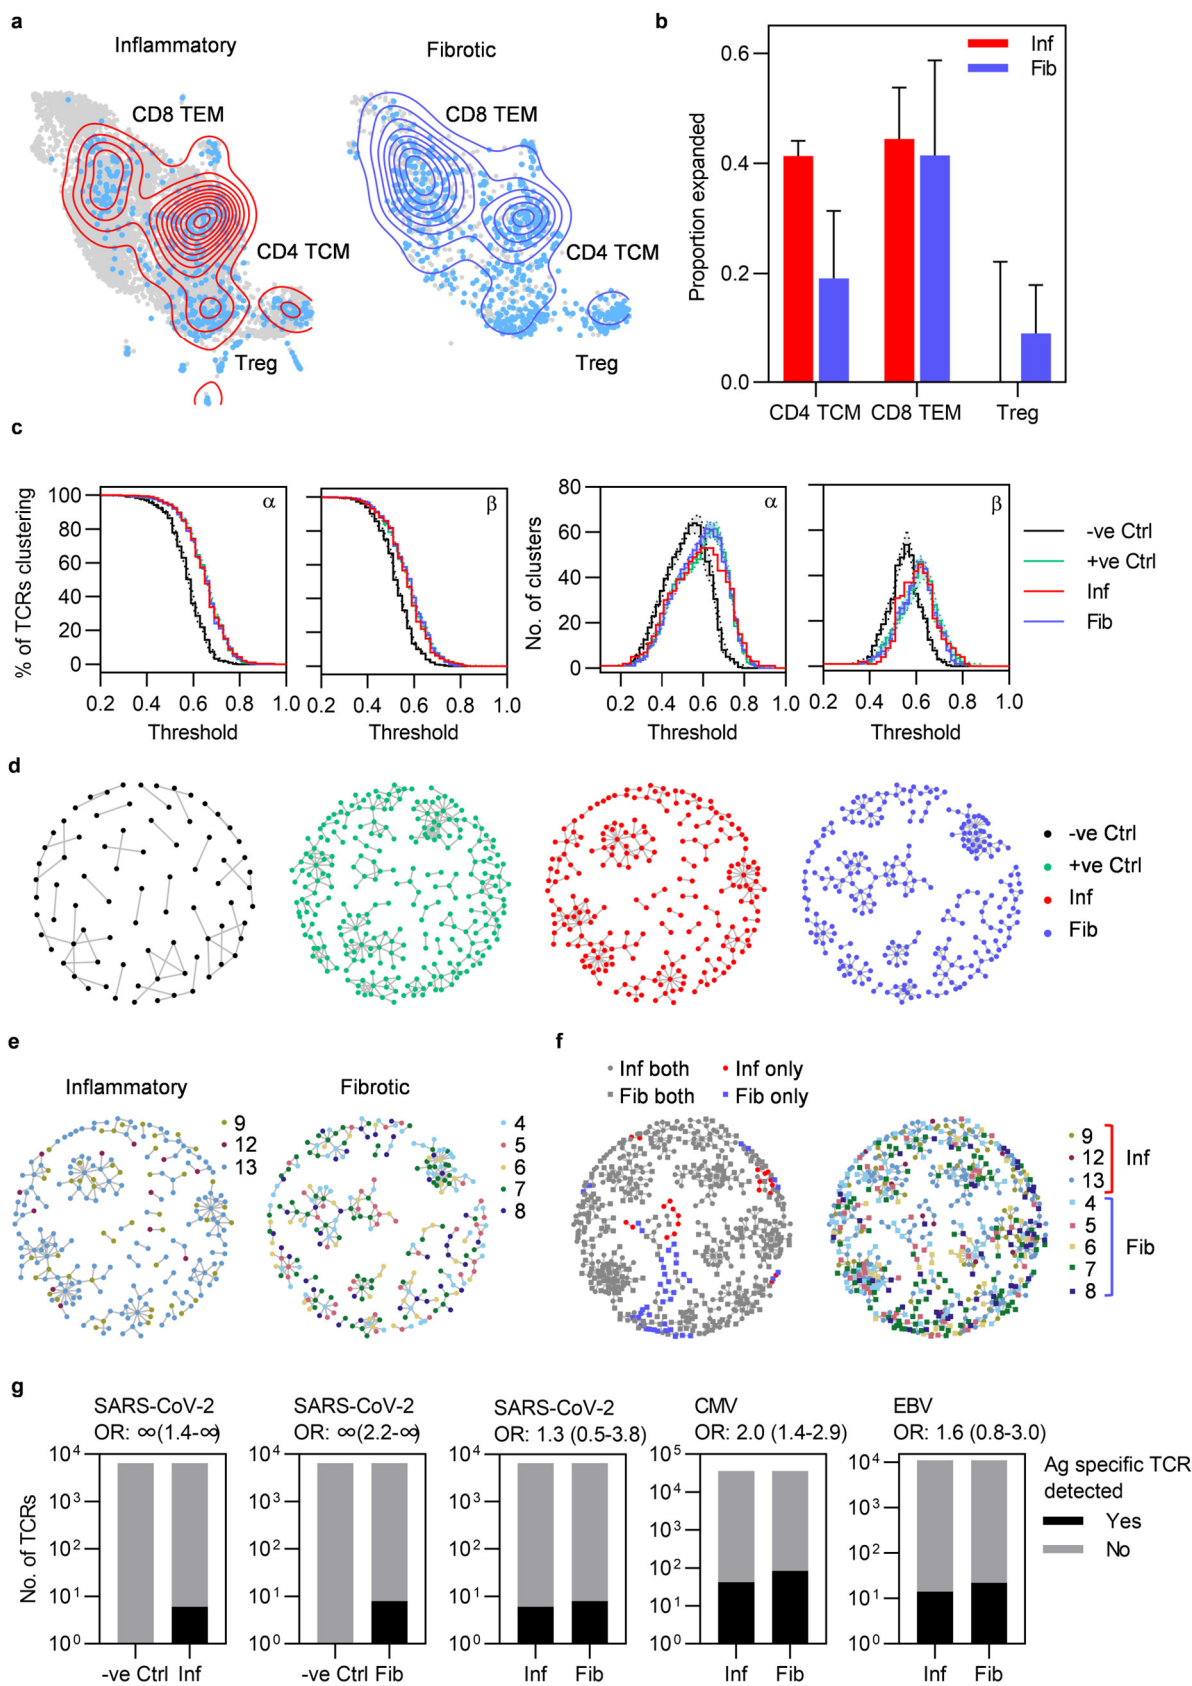

851

852 **Figure 4.** Highly similar T cell receptors (TCRs) characterize both inflammatory and

853 fibrotic post-COVID lung disease (PCLD). **a** T cell clonal expansion is visualized on  
854 the T cell UMAP split by radiological PCLD phenotype. TCR sequences detected at a  
855 frequency of greater than one are colored light blue and contour lines provide a 2D  
856 representation of TCR density overlaid in red for inflammatory PCLD and blue for  
857 fibrotic PCLD. **b** Comparison of the proportion of expanded TCR sequences, defined  
858 as those detected at a frequency greater than one in the three largest T cell subsets  
859 identified in Figure 2a in the two PCLD phenotypes. **c** Percentage of complementarity  
860 determining region (CDR)3 alpha and beta chain amino acid sequences clustering and  
861 number of clusters generated over a range of thresholds above which two TCRs are  
862 considered similar, for inflammatory and fibrotic PCLD bronchoalveolar lavage (BAL)  
863 samples, negative control PBMC samples not expected to cluster highly and positive  
864 control PBMC samples known to cluster highly, analyzed separately. **d** Representative  
865 network diagrams of TCR  $\beta$  chain clusters present in each group described in (c).  
866 Nodes represent TCRs, related TCRs are connected by an edge and colors represent  
867 the groups. **e** Network diagrams of related TCR  $\beta$  chains in each PCLD phenotype in  
868 which nodes are colored by donor. **f** Network diagrams visualizing TCR  $\beta$  chain  
869 clusters identified by combined analysis of the two PCLD phenotypes. Nodes are  
870 colored by donor (right) or radiological phenotype and membership of clusters  
871 composed of one or both PCLD groups (left), circular nodes represent inflammatory  
872 PCLD and square nodes fibrotic PCLD. **g** Number of TCR sequences ( $\alpha$  and  $\beta$  genes  
873 combined) annotated for SARS-CoV-2, cytomegalovirus (CMV), and Epstein-Barr  
874 virus (EBV) in VDJdb either detected or not detected in TCR sequences from  
875 individuals with each PCLD phenotype and negative controls, giving the odds ratio  
876  $\pm 95\%$  confidence interval (Fisher's exact test) for enrichment of antigen-specific TCR

877 sequences in each instance.

878

879 **TABLES**

880 **Table 1.** Clinical and demographic information summary.

|                                           | <b>Inflammatory<br/>N=5</b> | <b>Fibrotic<br/>N=5</b> |
|-------------------------------------------|-----------------------------|-------------------------|
| <b>Age</b>                                |                             |                         |
| Median (IQR)                              | 62 (21.5)                   | 59 (8.5)                |
| <b>Sex</b>                                |                             |                         |
| Male                                      | 2 (40%)                     | 4 (80%)                 |
| Female                                    | 3 (60%)                     | 1 (20%)                 |
| <b>Ethnicity</b>                          |                             |                         |
| White                                     | 3 (60%)                     | 3 (60%)                 |
| Asian                                     | 2 (40%)                     | 2 (40%)                 |
| <b>Body mass index (kg/m<sup>2</sup>)</b> |                             |                         |
| Median (IQR)                              | 31.8 (15.6)                 | 27.3 (6.1)              |
| <b>Smoking Status</b>                     |                             |                         |
| Never                                     | 4 (80%)                     | 2 (40%)                 |
| Former                                    | 1 (20%)                     | 3 (60%)                 |
| <b>COVID-19 wave</b>                      |                             |                         |
| 1                                         | 2 (40%)                     | 2 (40%)                 |
| 2                                         | 3 (60%)                     | 3 (60%)                 |
| <b>Respiratory Support</b>                |                             |                         |
| I&V†                                      | 2* (40%)                    | 4 (80%)                 |
| CPAP‡                                     | 1 (20%)                     | 0                       |
| HFNO‡                                     | 1 (20%)                     | 1 (20%)                 |
| nil                                       | 1 (20%)                     | 0                       |
| <b>Treatment for COVID-19</b>             |                             |                         |
| Steroid                                   | 3 (60%)                     | 5 (100%)                |
| Tocilizumab                               | 1 (20%)                     | 1 (20%)                 |
| Anti-viral                                | 0                           | 0                       |
| <b>BAL</b>                                |                             |                         |
| Days post-acute COVID (median (IQR))      | 116 (50)                    | 316 (50.5)              |

881 \*One patient also received ECMO (extracorporeal membrane oxygenation); †I&V  
 882 Intubation and ventilation; ‡CPAP Continuous Positive Airways Pressure; ‡HFNO  
 883 High Flow Nasal Oxygen.

884 **Support statement**

885 PM is supported by a Medical Research Council (MRC)/GlaxoSmithKline  
886 Experimental Medicine Initiative to Explore New Therapies network (EMINENT)  
887 Clinical Research Training Fellowship. EKD is supported by Breathing Matters. MZN  
888 is supported by a UK MRC Clinician Scientist Fellowship (MR/W00111X/1) and a  
889 Rutherford Fund Fellowship allocated by the MRC UK Regenerative Medicine Platform  
890 2 (MR/5005579/1). MN is supported by the Wellcome Trust (207511/Z/17/Z). GST is  
891 supported by a UK MRC Clinician Scientist Fellowship (MR/N007727/1). PM, EKD,  
892 MP, JSB, MZN, MN, RCC, JCP and GST are also supported by NIHR Biomedical  
893 Research Funding to UCL and UCLH.

894 **Author contributions**

895 GST, JCP, RCC and MZN conceived the study.  
896 EKD, PM, KBW, MY, JCP and GST collected the data.  
897 PM, EKD, KW, MY 10x Genomics platform.  
898 BSMDDDE, CTT, KF, MM, MZN, MP, JSB, BMC and MN provided resources or analysis  
899 tools.  
900 BSMDDDE, KF and GST performed the computational data analysis with contributions  
901 from AM, MM, BMC and MN.  
902 PM, BSMDDDE, EKD and GST prepared the manuscript draft.  
903 All authors reviewed and contributed to the final manuscript.

904 **COMPETING INTERESTS**

905 All authors declare no competing interests.

906
